# Supplementary material for: Gene expression profiles associated with acute myocardial infarction and risk of cardiovascular death
Source: PubMed Central journal article supplement (PMC4071233; doi:10.1186/gm560), 2014-05-30
Supplement: gm560-S1.pdf [file gm560-S1.pdf]

**Additional File 1 (Figure 1).** Kim *et al*, 2014

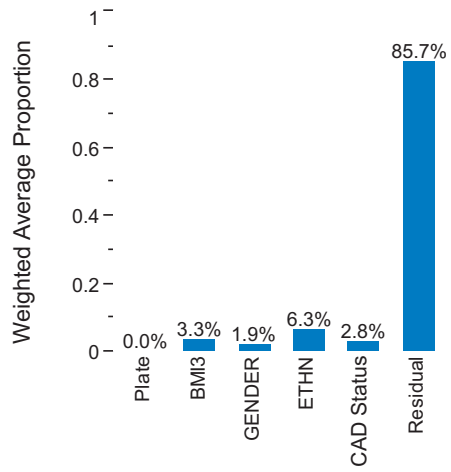

Variance Component (Discovery)

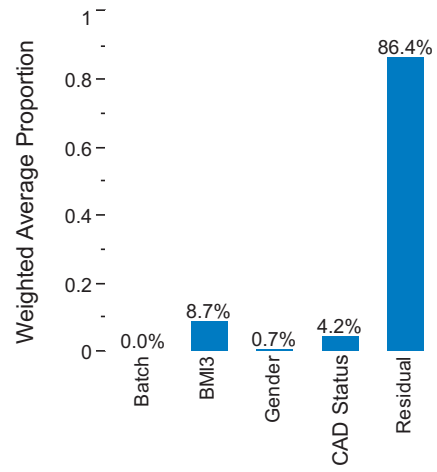

Variance Component (Replication)
