# Supplementary material for: Gene expression profiles associated with acute myocardial infarction and risk of cardiovascular death
Source: PubMed Central journal article supplement (PMC4071233; doi:10.1186/gm560), 2014-05-30
Supplement: gm560-S3.pdf [file gm560-S3.pdf]

**Additional File 3 (Table 2)**

## Association of Gene Expression Components with Cell Counts

---

| Variable        | WBC                   | Neutrophils |
|-----------------|-----------------------|-------------|
| PC 1 (16.0%)    | $2.8 \times 10^{-4}$  | 0.18        |
| PC 2 (11.2%)    | $9.5 \times 10^{-5}$  | 0.25        |
| PC 3 (6.2%)     | $4.1 \times 10^{-7}$  | 0.21        |
| PC 4 (3.5%)     | 0.002                 | 0.02        |
| PC 5 (3.0%)     | 0.37                  | 0.98        |
| Axis1           | $6.9 \times 10^{-11}$ | 0.02        |
| Axis2           | 0.16                  | 0.96        |
| Axis3           | 0.13                  | 0.25        |
| Axis4           | $7.7 \times 10^{-4}$  | 0.46        |
| Axis5           | $4.7 \times 10^{-11}$ | 0.006       |
| Axis6           | 0.19                  | 0.05        |
| Axis7           | 0.095                 | 0.003       |
| Axis8           | 0.003                 | 0.44        |
| Axis9           | $4.7 \times 10^{-8}$  | 0.25        |
| Death_joint_PC1 | $3.9 \times 10^{-10}$ | 0.06        |

---

Table shows p-values for regression of white blood cell (WBC) or Neutrophil count on the indicated Principal Component (with amount of variance it captures) or Axis of Variation score.
