# Supplementary material for: Gene expression profiles associated with acute myocardial infarction and risk of cardiovascular death
Source: PubMed Central journal article supplement (PMC4071233; doi:10.1186/gm560), 2014-05-30

**Additional File 4 (Figure 2).** Kim *et al*, 2014

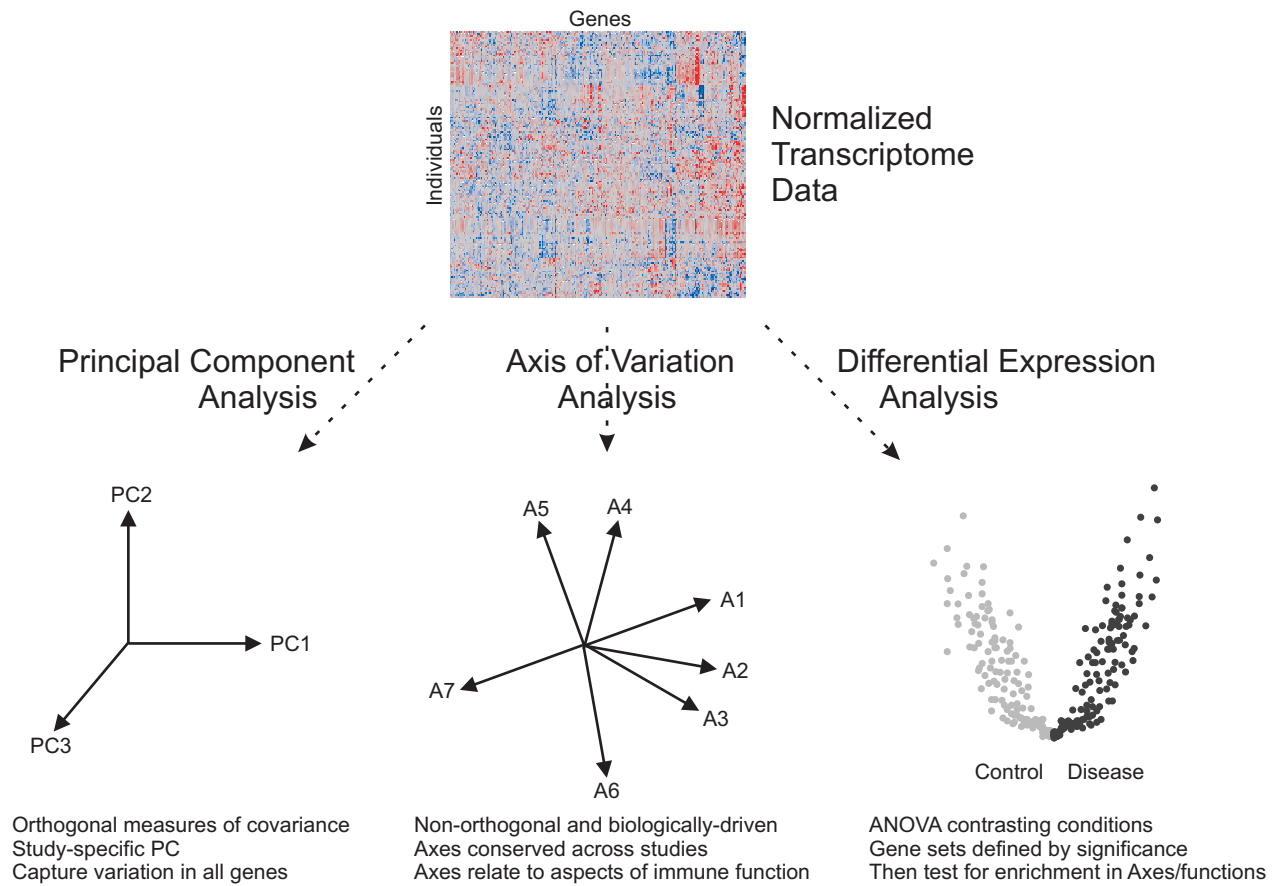

Supplement: gm560-S4.pdf [file gm560-S4.pdf]
