# Supplementary material for: Gene expression profiles associated with acute myocardial infarction and risk of cardiovascular death
Source: PubMed Central journal article supplement (PMC4071233; doi:10.1186/gm560), 2014-05-30
Supplement: gm560-S5.pdf [file gm560-S5.pdf]

**Additional File 5 (Table 4)** Covariance of WBC, Axis 1 and Axis 5 with Acute MI

---

|                 | Estimate      | Chi-square | P-value                 | AUC  |
|-----------------|---------------|------------|-------------------------|------|
| WBC             | -0.26         | 22.9       | $5 \times 10^{-6}$      | 0.71 |
| Axis 1          | 0.21          | 14.6       | $1 \times 10^{-4}$      | 0.66 |
| Axis 5          | -0.16         | 7.9        | 0.0049                  | 0.65 |
| WBC with Axis 1 | -0.23 / 0.09  | 16.3 / 2.2 | $5 \times 10^{-5}$ / ns | 0.74 |
| WBC with Axis 5 | -0.25 / -0.04 | 18.0 / 0.5 | $2 \times 10^{-5}$ / ns | 0.72 |

---

Estimates for the bottom two rows are for the WBC and Axis score respectively

When both terms are included in the covariance model, indicating that the WBC

Axis associations are largely due to their correlation with WBC.
