# Supplementary material for: Gene expression profiles associated with acute myocardial infarction and risk of cardiovascular death
Source: PubMed Central journal article supplement (PMC4071233; doi:10.1186/gm560), 2014-05-30

Additional File 7 (Figure 3 Kim *et al*, 2014).

A.

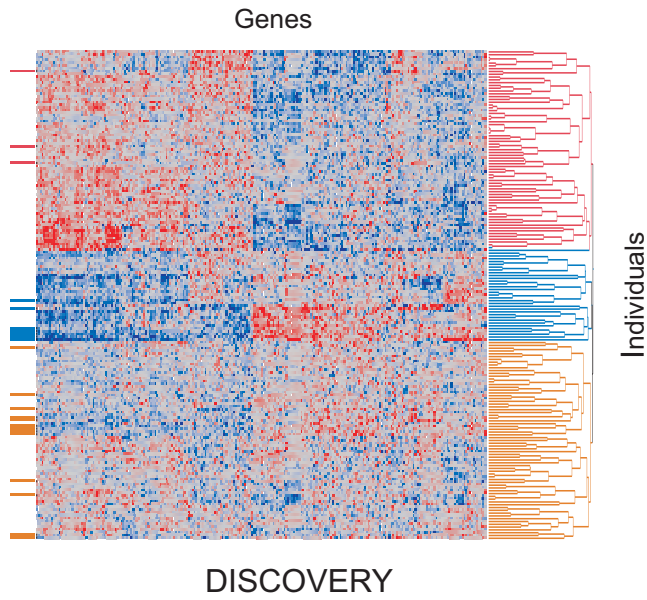

B.

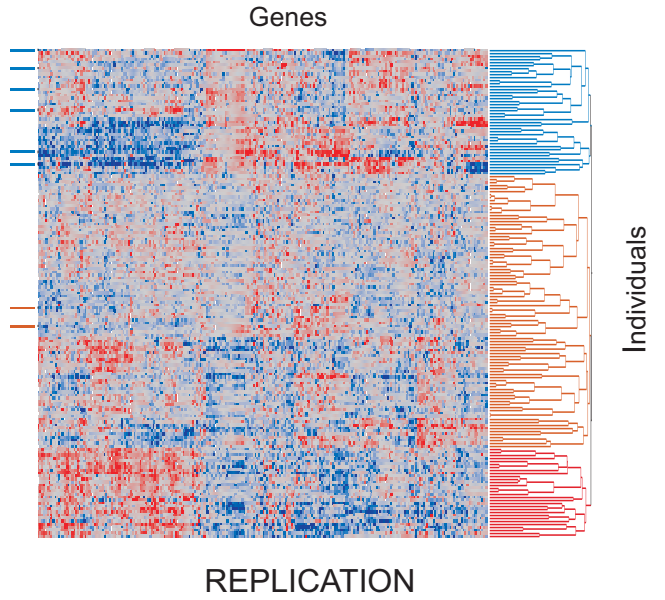

C.

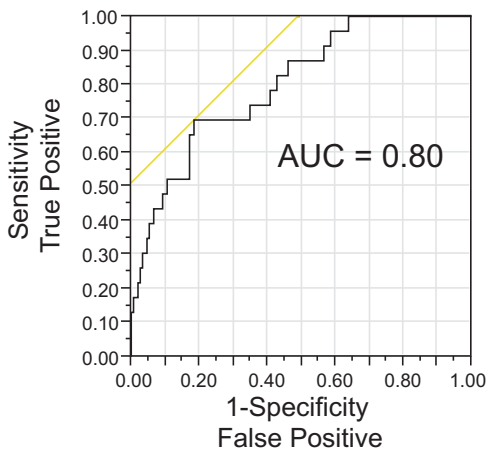

D.

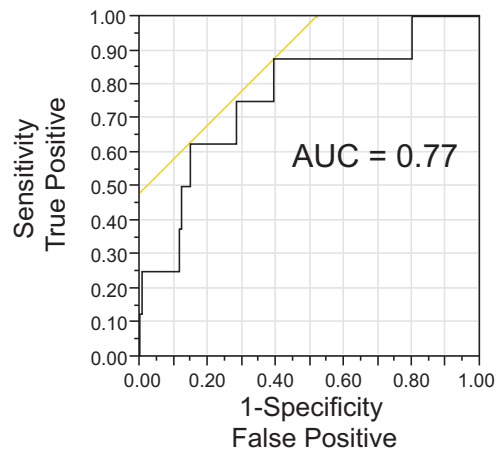

Supplement: gm560-S7.pdf [file gm560-S7.pdf]
