# Supplementary material for: Gene expression profiles associated with acute myocardial infarction and risk of cardiovascular death
Source: PubMed Central journal article supplement (PMC4071233; doi:10.1186/gm560), 2014-05-30

# Additional File 9 (Figure 4). Kim *et al*, 2014

A.

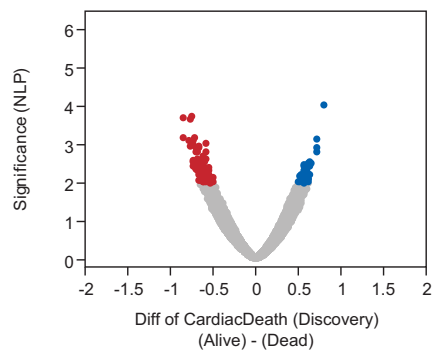

B.

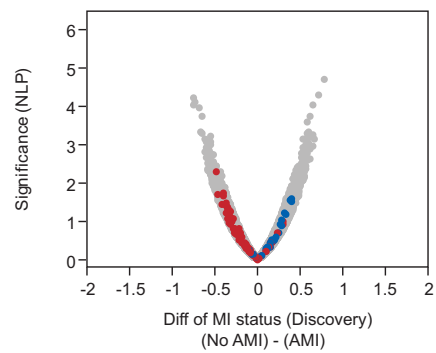

C.

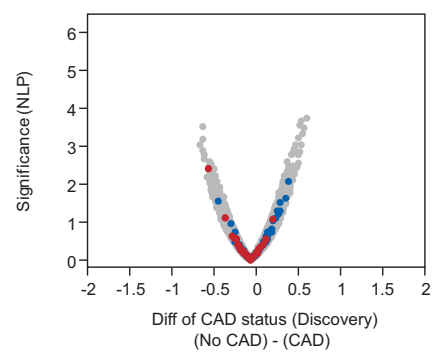

D.

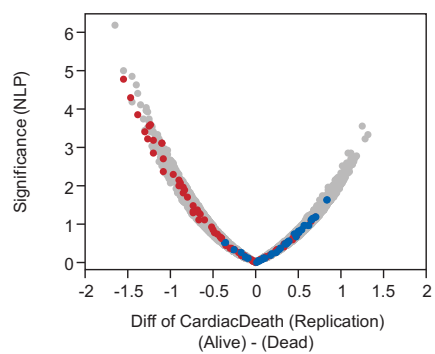

Supplement: gm560-S9.pdf [file gm560-S9.pdf]
